# Supplementary material for: Establishing and validating an ADCP-related prognostic signature in pancreatic ductal adenocarcinoma
Source: publisher site journal article supplement (doi:10.18632/aging.204221), 2022-08-12
Supplement: Supplementary file [file aging-v14i15-204221-supplementary-material-SD2.pdf]

## SUPPLEMENTARY TABLES

Supplementary Table 2. The result of multivariate analysis in PDAC.

| <b>ID</b> | <b>Coefficient</b> | <b>Hazard Ratio</b> | <b>HR.95L</b> | <b>HR.95H</b> | <b>P value</b> |
|-----------|--------------------|---------------------|---------------|---------------|----------------|
| CALB2     | 0.355526           | 1.426931            | 1.001137      | 2.033819      | 0.04927        |
| NLGN2     | -0.86862           | 0.41953             | 0.152186      | 1.156515      | 0.009317       |
| NCAPG     | 0.932348           | 2.540468            | 1.321665      | 4.88322       | 0.005166       |
| SERTAD2   | 1.153568           | 3.16948             | 1.074573      | 9.34846       | 0.036592       |
