# Supplementary material for: Establishing and validating an ADCP-related prognostic signature in pancreatic ductal adenocarcinoma
Source: Aging (Albany NY). 2022 Aug 12;14(15):6299–315. doi: 10.18632/aging.204221 (PMC9417234; doi:10.18632/aging.204221)
Supplement: Supplementary Table 1 [file aging-14-204221-s001.xls]

## Sheet: Supplementary Table 1
Supplementary Table 1. The list of identified differential genes in PDAC.
gene	conMean	treatMean	logFC	pValue	fdr
TMEM110-MUSTN1	1.5211	0.096304	-3.98137	3.26e-57	5.01e-55
KIF4A	0.128914	1.60726	3.64013	4.17e-57	5.01e-55
CELF6	1.35555	0.00841825	-7.33114	9.05e-57	7.1e-55
TEN1	3.52747	0.0921276	-5.25886	1.22e-56	7.73e-55
GOLGA8S	0.39594	0.0107262	-5.20607	1.32e-56	8.15e-55
SLC24A3	0.490946	2.54135	2.37196	2.2e-56	1.17e-54
TOP3B	2.82079	0.0820209	-5.10396	2.48e-56	1.24e-54
CSF2	0.0320218	1.03367	5.01258	4.37e-56	1.83e-54
CBWD3	3.34098	0.0612554	-5.76929	6.26e-56	2.25e-54
TICAM2	1.23837	0.0667352	-4.21386	9.05e-56	2.98e-54
POLR2F	4.29195	0.0372685	-6.84753	1.26e-55	3.61e-54
GOLGA8R	1.50349	0.0860339	-4.12727	1.45e-55	3.85e-54
SLX1B	2.02878	0.0180905	-6.80924	1.56e-55	4.06e-54
CDH23	2.32521	0.452824	-2.36034	2.87e-55	6.11e-54
FAM153B	2.39622	0.167272	-3.8405	3.87e-55	7.62e-54
MEMO1	3.11683	0.509591	-2.61267	4e-55	7.81e-54
RTEL1	2.3415	0.232104	-3.33459	4.21e-55	7.95e-54
LPAR5	0.40802	2.42183	2.56939	5.68e-55	1.02e-53
CDC20	0.504578	3.11556	2.62634	6.6e-55	1.15e-53
GSTM2	5.58682	1.20249	-2.216	7.41e-55	1.26e-53
CDK3	2.4948	0.408907	-2.60908	7.41e-55	1.26e-53
GPS2	4.72588	1.12333	-2.0728	7.6e-55	1.28e-53
AGAP5	2.68117	0.107023	-4.64688	8.61e-55	1.44e-53
GUCY2C	0.0936411	0.891627	3.25123	1.3e-54	1.98e-53
SCLY	3.23853	0.326536	-3.31002	3.58e-54	4.6e-53
HYPK	1.81229	0.430609	-2.07336	6.92e-54	7.54e-53
MATR3	3.32135	0.508944	-2.70619	7.51e-54	7.96e-53
IL12RB2	1.27482	0.143981	-3.14635	7.64e-54	8.06e-53
ARPC4-TTLL3	1.81008	0.141348	-3.67873	8.86e-54	9.06e-53
CBWD1	3.83454	0.568906	-2.75279	1.29e-53	1.18e-52
BRSK2	5.38503	0.593388	-3.18191	1.34e-53	1.21e-52
POLN	0.796035	0.172116	-2.20945	1.77e-53	1.51e-52
PPP1R14C	0.417296	2.50941	2.5882	2.26e-53	1.84e-52
NRG4	3.59583	0.456803	-2.97668	2.53e-53	1.99e-52
MFSD2A	0.369774	2.11031	2.51274	2.8e-53	2.14e-52
COL8A2	0.509468	3.20081	2.65138	3.13e-53	2.35e-52
SCUBE3	0.107358	1.06338	3.30816	3.35e-53	2.48e-52
DPP10	1.72128	0.168176	-3.35544	3.67e-53	2.7e-52
LRRC15	0.0803322	2.11385	4.71775	6.39e-53	4.35e-52
NOMO2	6.29978	1.30417	-2.27217	8.21e-53	5.3e-52
GET4	4.28235	0.958155	-2.16007	1.08e-52	6.7e-52
DTL	0.24168	1.33611	2.46687	1.14e-52	6.97e-52
GINS1	0.297375	1.2423	2.06265	1.45e-52	8.73e-52
NOMO3	4.58088	0.470968	-3.28192	1.55e-52	9.15e-52
RUNX3	0.511024	2.0785	2.02408	1.67e-52	9.77e-52
LMO3	3.09546	0.580958	-2.41365	2.52e-52	1.4e-51
RYR2	1.94527	0.320907	-2.59974	2.57e-52	1.42e-51
LHFPL5	1.51002	0.126147	-3.58139	3.02e-52	1.63e-51
MSANTD1	0.569481	0.0857589	-2.73129	3.79e-52	1.99e-51
PAX2	0.27268	0.0275243	-3.30844	4.29e-52	2.23e-51
NUF2	0.255831	1.35847	2.40872	1.01e-51	4.96e-51
NPIPA5	3.20103	0.706975	-2.1788	1.05e-51	5.1e-51
GDF10	2.39072	0.328188	-2.86485	1.59e-51	7.55e-51
CERS3	0.155783	0.0149976	-3.37673	1.59e-51	7.55e-51
ANLN	0.340169	2.23789	2.71781	1.9e-51	8.96e-51
MCOLN3	2.97724	0.62914	-2.24252	2.13e-51	9.89e-51
CABP1	0.787798	0.195484	-2.01078	3.39e-51	1.5e-50
WDR88	0.110162	0.44333	2.00875	3.85e-51	1.7e-50
SPC24	0.351657	1.56932	2.1579	1.34e-50	5.6e-50
SLC1A2	2.01707	0.294007	-2.77834	1.41e-50	5.86e-50
BHLHA15	6.45472	1.42103	-2.18341	2.93e-50	1.17e-49
CLCNKA	1.59056	0.243732	-2.70617	4.94e-50	1.93e-49
TNFSF11	0.142489	1.57602	3.46737	7.34e-50	2.81e-49
SFN	0.853691	6.486	2.92554	7.82e-50	2.96e-49
GRIN2C	0.393005	0.0967927	-2.02158	1.7e-49	6.23e-49
LAIR2	0.0371729	0.501888	3.75504	2.68e-49	9.65e-49
AK4	0.537816	2.23283	2.05369	2.88e-49	1.03e-48
ADAMTS12	0.408057	2.44205	2.58125	3.45e-49	1.22e-48
NCAPG	0.243902	1.27907	2.39072	4.61e-49	1.62e-48
LCN6	1.70291	0.247023	-2.78528	5.6e-49	1.95e-48
CAPN9	0.153751	2.24828	3.87015	7.05e-49	2.42e-48
CDC45	0.333075	1.48434	2.1559	1.16e-48	3.9e-48
MYB	0.130778	0.694967	2.40983	1.18e-48	3.96e-48
COCH	3.29984	0.657093	-2.32823	1.41e-48	4.72e-48
KLHDC7B	0.17296	1.52182	3.13728	3.52e-48	1.15e-47
CALB2	0.407652	2.57122	2.65704	3.77e-48	1.23e-47
SERTAD2	1.04044	2.81229	2.70299	4.47e-48	1.45e-47
UHRF1	0.281958	1.33372	2.2419	7.17e-48	2.29e-47
B3GNT6	0.0424772	1.38682	5.02895	7.3e-48	2.32e-47
ZNF488	0.0651602	0.89965	3.7873	7.63e-48	2.42e-47
KIF18A	0.147474	0.747067	2.34077	8.57e-48	2.7e-47
FAM155A	0.126181	0.646722	2.35765	4.71e-47	1.43e-46
IDO1	0.325358	1.67282	2.36219	5.83e-47	1.76e-46
CD1C	0.284515	1.93228	2.76373	6.63e-47	1.99e-46
MCM10	0.121729	0.668797	2.4579	1.28e-46	3.75e-46
HIST1H4H	0.447528	2.07123	2.21044	1.35e-46	3.94e-46
ULBP2	0.295801	1.42738	2.27067	3.19e-46	9.16e-46
FAM177B	0.201507	1.47331	2.87016	1.23e-45	3.4e-45
LAMB4	0.321976	0.0754088	-2.09415	1.95e-45	5.35e-45
TCN1	1.2229	6.04382	2.30516	2.23e-45	6.09e-45
CD28	0.116714	0.685875	2.55497	2.96e-45	8.01e-45
VSIG1	0.204708	3.0175	3.88171	4.62e-45	1.23e-44
CD79A	0.474811	2.66806	2.49037	6.7e-45	1.77e-44
SIT1	0.284498	1.34821	2.24455	2.9e-44	7.47e-44
KLHL30	0.108347	0.61064	2.49467	4.94e-44	1.26e-43
COL11A1	0.374342	3.58789	3.26071	1.31e-43	3.31e-43
KCNS1	0.106829	0.723702	2.76009	2.13e-43	5.33e-43
KCNJ1	0.134059	0.0179122	-2.90386	2.19e-43	5.46e-43
ADAD2	0.314826	0.0502155	-2.64835	5.63e-43	1.38e-42
FGFBP1	0.245295	2.38192	3.27953	2.04e-42	4.89e-42
TNFRSF13C	0.153568	0.932938	2.6029	8.71e-42	2.04e-41
NKX3-2	0.199422	0.999665	2.32562	1.39e-41	3.23e-41
OBP2A	0.0250267	0.287115	3.52009	2.55e-41	5.85e-41
SLITRK6	0.10802	0.840557	2.96005	8.36e-41	1.89e-40
RFX4	0.116214	0.011109	-3.38699	9.19e-41	2.07e-40
PNPLA3	0.111366	0.635972	2.51366	9.77e-41	2.19e-40
IGHV1-2	0.508826	3.55682	2.80535	1.31e-40	2.93e-40
HHATL	0.787187	0.186897	-2.07446	2.42e-40	5.37e-40
IGLV7-46	0.54157	3.0465	2.49193	3.97e-40	8.74e-40
FOXA1	0.361858	1.61184	2.15521	7.49e-40	1.64e-39
SLC9A3	0.231207	1.69978	2.87809	9.93e-40	2.16e-39
ST20-MTHFS	0.628993	0.0887169	-2.82576	6.25e-39	1.33e-38
IL12B	0.0110276	0.083408	2.91907	7.53e-38	1.56e-37
HES2	0.0695846	0.573507	3.04297	1.12e-37	2.32e-37
CLDN18	0.394762	5.08428	3.68699	2.9e-37	5.93e-37
IRX5	0.122469	0.823726	2.74975	3.25e-37	6.64e-37
UBE2Q2L	0.402332	0.0516992	-2.96017	2.02e-36	4.05e-36
TNP1	0.464273	0.00285972	-7.34295	3.53e-36	7.04e-36
HIST1H3D	0.216196	1.04149	2.26824	3.01e-35	5.89e-35
ALPK2	0.104286	0.506621	2.28036	5.62e-35	1.09e-34
FCRL4	0.0180411	0.0743498	2.04304	3.33e-34	6.35e-34
CKM	1.32365	0.221607	-2.57845	7.86e-34	1.49e-33
PRAP1	0.224447	2.03705	3.18204	3.39e-33	6.31e-33
IRF4	0.181915	0.728677	2.00202	6.58e-33	1.22e-32
F8A3	1.35776	0.00656252	-7.69276	6.58e-32	1.18e-31
SOGA3	0.117177	0.0126708	-3.20911	7.66e-32	1.37e-31
FGF3	0.0035173	0.19246	5.77395	1.66e-31	2.96e-31
TRAV26-2	0.0182863	0.203019	3.47279	2.52e-31	4.48e-31
COL24A1	0.0852085	0.351783	2.04562	2.54e-31	4.51e-31
LRRC55	0.124898	0.514703	2.04299	3.53e-31	6.25e-31
FAM184B	0.0159501	0.0660638	2.05029	1.28e-30	2.24e-30
NMRK2	0.239909	0.0245785	-3.28702	4.07e-30	7.05e-30
EGR4	0.0932365	0.495575	2.41014	7.92e-30	1.37e-29
GDNF	0.0635262	0.293288	2.2069	2.99e-29	5.1e-29
MIA	0.664882	2.69617	2.01974	4.53e-29	7.71e-29
NLGN2	1.22608	2.96166	2.41555	5.55e-29	9.41e-29
TRAT1	0.102618	0.476876	2.21633	1.06e-28	1.79e-28
TRAV36DV7	0.0273676	0.201473	2.88005	4.75e-28	7.93e-28
GPR20	0.166399	0.669193	2.00778	5.59e-28	9.33e-28
TECRL	0.0565043	0.000101197	-9.12505	1.23e-27	2.04e-27
GJB6	0.0974876	0.862447	3.14515	4.61e-26	7.41e-26
PRSS42	0.129997	0.0271085	-2.26166	5.8e-25	9.16e-25
FCRL3	0.104796	0.464499	2.14809	2.4e-24	3.74e-24
HIST1H1B	0.0241688	0.130511	2.43295	4.44e-24	6.89e-24
XIRP1	0.142711	0.597069	2.0648	2.24e-23	3.42e-23
ANKRD18B	0.360562	0.081715	-2.14157	1.09e-22	1.65e-22
HBE1	0.162356	0.0389192	-2.06061	1.19e-22	1.8e-22
VSTM1	0.0734804	0.315411	2.1018	3.79e-21	5.59e-21
FOXB1	0.00495587	0.0340684	2.78123	4.65e-21	6.85e-21
CHRND	0.0681384	0.00930816	-2.8719	9.29e-21	1.37e-20
SOX2	0.133321	0.55747	2.06398	1.33e-20	1.95e-20
HAS1	0.222425	0.970567	2.12551	1.81e-20	2.64e-20
STOML3	0.00989944	0.0633085	2.67698	4.66e-19	6.64e-19
ALX4	0.0531541	0.0119809	-2.14945	3.75e-17	5.22e-17
GAL3ST2	0.0362791	0.204299	2.49347	2.81e-16	3.85e-16
TMEM189-UBE2V1	0.337193	0.00513876	-6.03601	3.73e-15	5.03e-15
UGT1A6	0.0944464	0.399873	2.08197	3.71e-14	4.92e-14
UPK2	0.130087	0.684062	2.39466	1.35e-11	1.7e-11
MUC22	0.0332079	0.00299384	-3.47146	2.19e-08	2.62e-08
FCER2	0.152459	0.645161	2.08124	1.99e-06	2.31e-06
